# Supplementary material
Source: PubMed Central journal article supplement (PMC4574238)
Supplement: supp_115.177873_177873SI.pdf [file supp_115.177873_177873SI.pdf]

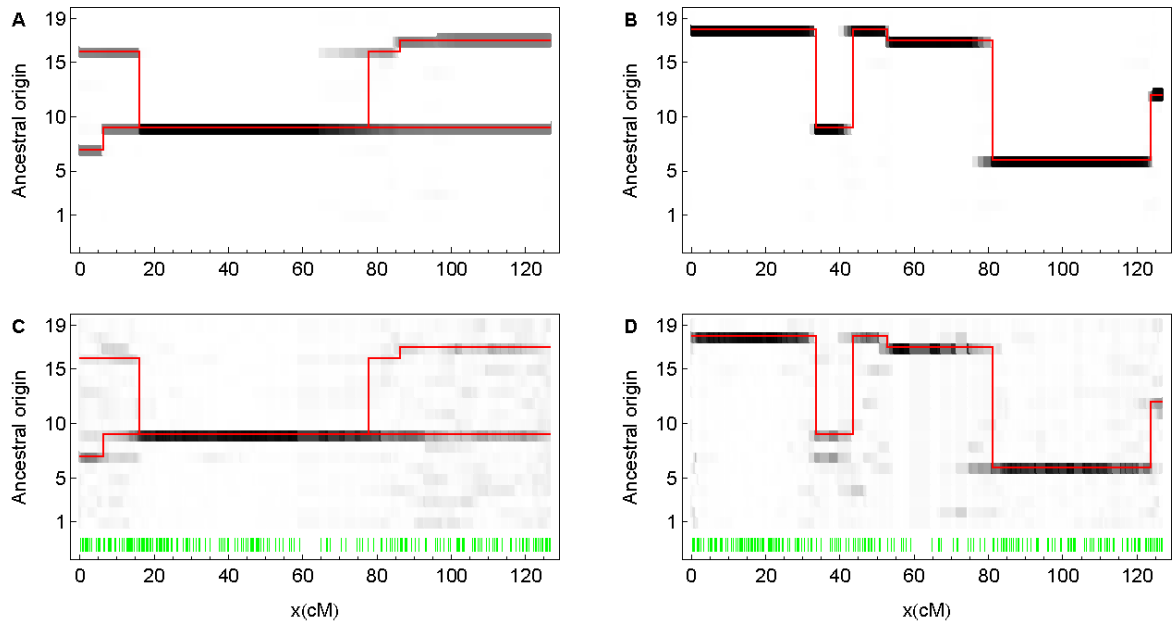

**Figure S1** The posterior probabilities of the 19 ancestral origins obtained from the simulated datasets MAGIC-F5 (left panels) and MAGIC-F11 (right panels). The top and bottom panels denote the results obtained from RABBIT (jointModel) and HAPPY, respectively. The mode of HAPPY is diploid for the MAGIC-F5 and haploid for the MAGIC-F11. The probabilities are represented by gray levels, with white =0 and black =1. The red lines denote the true ancestral origins. The green vertical bars in the bottom panels denote the marker locations.

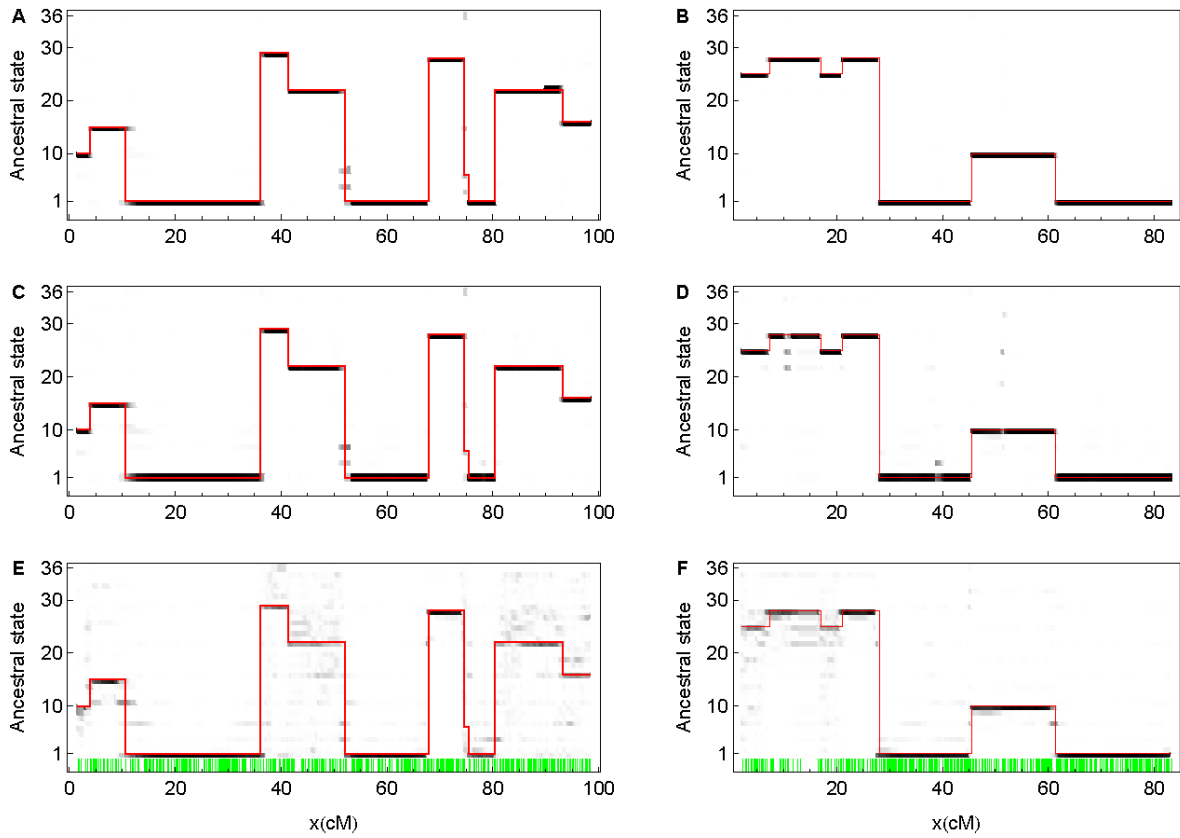

**Figure S2** The posterior probabilities of the 36 ancestral origin states obtained from the simulated datasets CC-F11-AA (left panels) and CC-F11-XX (right panels). The top, middle, and bottom panels denote the results obtained from RABBIT (jointModel), GAIN, and HAPPY (diploid), respectively. The probabilities are represented by gray levels, with white =0 and black =1. The red lines denote the true ancestral origin states. The green vertical bars in the bottom panels denote the marker locations.

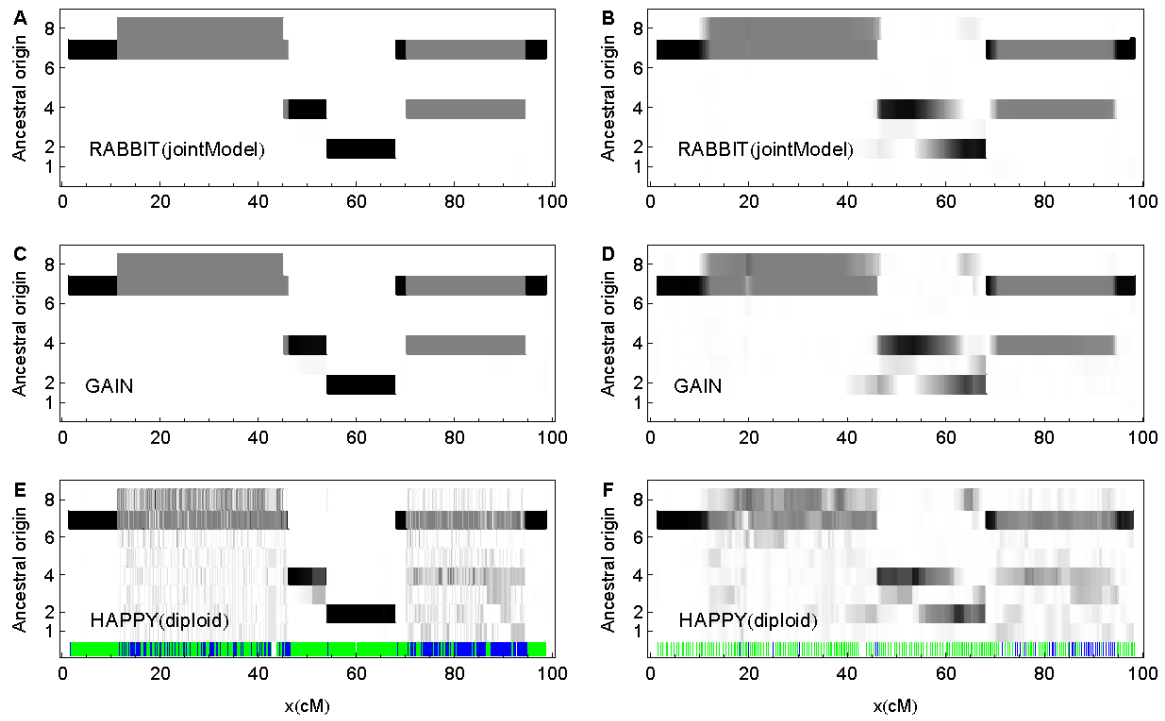

**Figure S3** Similar to Figure 7 but for the posterior probabilities of the eight ancestral origins along the first pair of autosomes of the example pre-CC line (IL-18).

**Table S1** Probability  $P(Y|Z, \epsilon)$  of the observed genotype  $Y$  given the true phased genotype  $Z$ , and the allelic typing error probability  $\epsilon$ . Dashes denote missing alleles in a sampled individual. In practice, genotypes  $1/-$  and  $2/-$  are rarely called from probe intensity data.

| Observed genotype $Y$ | True phased genotype $Z$  |                                 |                                 |                           |
|-----------------------|---------------------------|---------------------------------|---------------------------------|---------------------------|
|                       | (1, 1)                    | (1, 2)                          | (2, 1)                          | (2, 2)                    |
| $-/-$                 | 1                         | 1                               | 1                               | 1                         |
| $1/-$                 | $1 - \epsilon$            | $1/2$                           | $1/2$                           | $\epsilon$                |
| $2/-$                 | $\epsilon$                | $1/2$                           | $1/2$                           | $1 - \epsilon$            |
| $1/1$                 | $(1 - \epsilon)^2$        | $\epsilon(1 - \epsilon)$        | $\epsilon(1 - \epsilon)$        | $\epsilon^2$              |
| $1/2$                 | $2\epsilon(1 - \epsilon)$ | $\epsilon^2 + (1 - \epsilon)^2$ | $\epsilon^2 + (1 - \epsilon)^2$ | $2\epsilon(1 - \epsilon)$ |
| $2/2$                 | $\epsilon^2$              | $\epsilon(1 - \epsilon)$        | $\epsilon(1 - \epsilon)$        | $(1 - \epsilon)^2$        |

**Table S2** Probability  $P(\mathbf{D}|\mathbf{Z}, \mathbf{O}, \epsilon_F)$  of the derived genotype  $\mathbf{D}$  given the true phased genotype  $\mathbf{Z}$ , the latent ancestral origin state  $\mathbf{O}$ , and the allelic typing error probability  $\epsilon_F$ . The  $\delta$  is an indicator of the latent IBD, and the question marks denote missing alleles derived from founders.

| Derived genotype $\mathbf{D}$ | True phased genotype $\mathbf{Z}$                         |                                          |                                          |                                                           |
|-------------------------------|-----------------------------------------------------------|------------------------------------------|------------------------------------------|-----------------------------------------------------------|
|                               | (1, 1)                                                    | (1, 2)                                   | (2, 1)                                   | (2, 2)                                                    |
| (?, ?)                        | 1                                                         | $1 - \delta$                             | $1 - \delta$                             | 1                                                         |
| (?, 1)                        | $(1 - \delta)(1 - \epsilon_F)$                            | $(1 - \delta)\epsilon_F$                 | $(1 - \delta)(1 - \epsilon_F)$           | $(1 - \delta)\epsilon_F$                                  |
| (1, ?)                        | $(1 - \delta)(1 - \epsilon_F)$                            | $(1 - \delta)(1 - \epsilon_F)$           | $(1 - \delta)\epsilon_F$                 | $(1 - \delta)\epsilon_F$                                  |
| (2, ?)                        | $(1 - \delta)\epsilon_F$                                  | $(1 - \delta)(1 - \epsilon_F)$           | $(1 - \delta)\epsilon_F$                 | $(1 - \delta)(1 - \epsilon_F)$                            |
| (?, 2)                        | $(1 - \delta)\epsilon_F$                                  | $(1 - \delta)\epsilon_F$                 | $(1 - \delta)(1 - \epsilon_F)$           | $(1 - \delta)(1 - \epsilon_F)$                            |
| (1, 1)                        | $\delta(1 - \epsilon_F) + (1 - \delta)(1 - \epsilon_F)^2$ | $(1 - \delta)\epsilon_F(1 - \epsilon_F)$ | $(1 - \delta)\epsilon_F(1 - \epsilon_F)$ | $\delta\epsilon_F + (1 - \delta)\epsilon_F^2$             |
| (1, 2)                        | $(1 - \delta)\epsilon_F(1 - \epsilon_F)$                  | $(1 - \delta)(1 - \epsilon_F)^2$         | $(1 - \delta)\epsilon_F^2$               | $(1 - \delta)\epsilon_F(1 - \epsilon_F)$                  |
| (2, 1)                        | $(1 - \delta)\epsilon_F(1 - \epsilon_F)$                  | $(1 - \delta)\epsilon_F^2$               | $(1 - \delta)(1 - \epsilon_F)^2$         | $(1 - \delta)\epsilon_F(1 - \epsilon_F)$                  |
| (1, 2)                        | $\delta\epsilon_F + (1 - \delta)\epsilon_F^2$             | $(1 - \delta)\epsilon_F(1 - \epsilon_F)$ | $(1 - \delta)\epsilon_F(1 - \epsilon_F)$ | $\delta(1 - \epsilon_F) + (1 - \delta)(1 - \epsilon_F)^2$ |

**Table S3** Probability  $P(Y|Z, \epsilon)$  of the observed allele  $Y$  given the true allele  $Z$ , and the allelic typing error probability  $\epsilon$ . Dashes denote missing alleles in a sampled individual.

| Observed allele $Y$ | True allele $Z$ |                |
|---------------------|-----------------|----------------|
|                     | 1               | 2              |
| –                   | 1               | 1              |
| 1                   | $1 - \epsilon$  | $\epsilon$     |
| 2                   | $\epsilon$      | $1 - \epsilon$ |

**Table S4** Probability  $P(D|Z, O, \epsilon_F)$  of the derived allele  $D$  given the true allele  $Z$ , the latent ancestral origin  $O$ , and the allelic typing error probability  $\epsilon_F$ . The question marks denote missing alleles derived from founders.

| Derived allele $D$ | True allele $Z$  |                  |
|--------------------|------------------|------------------|
|                    | 1                | 2                |
| ?                  | 1                | 1                |
| 1                  | $1 - \epsilon_F$ | $\epsilon_F$     |
| 2                  | $\epsilon_F$     | $1 - \epsilon_F$ |
