# Supplementary material
Source: PubMed Central journal article supplement (PMC4574238)
Supplement: supp_115.177873_FigureS2.pdf [file supp_115.177873_FigureS2.pdf]

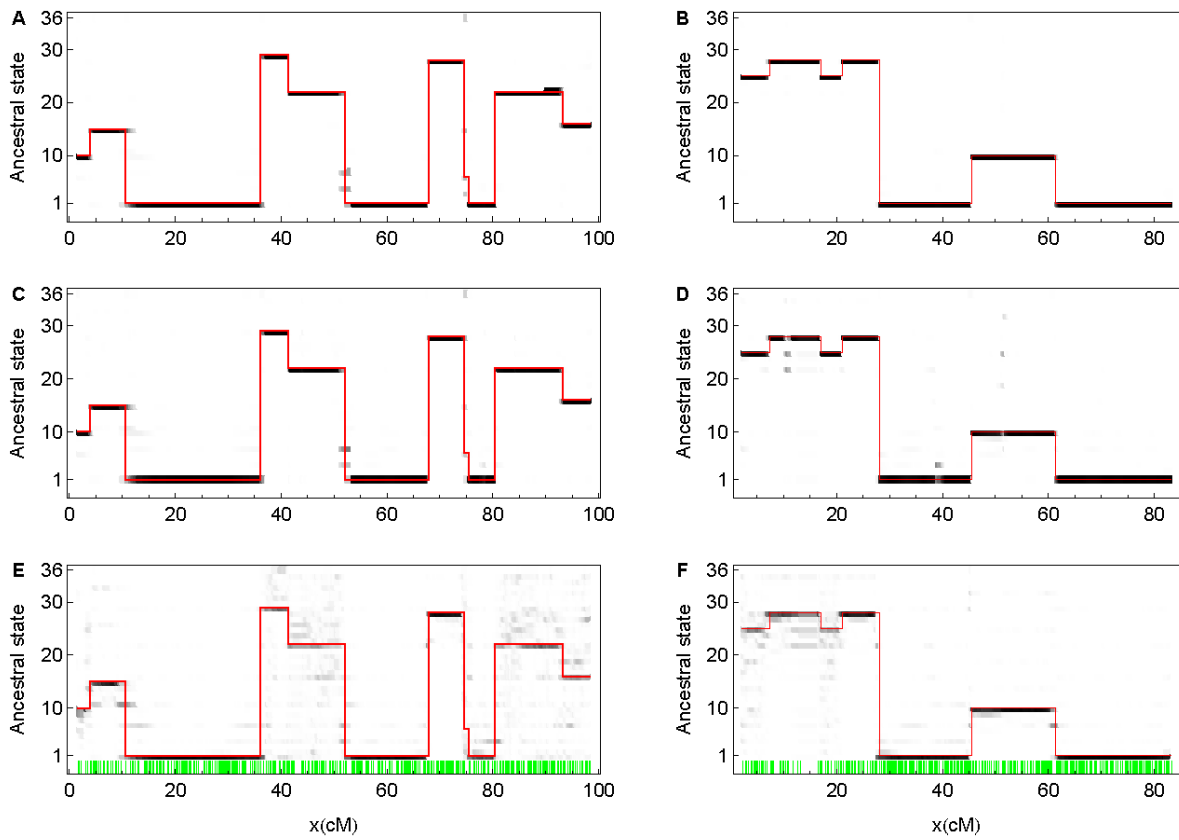

**Figure S2** The posterior probabilities of the 36 ancestral origin states obtained from the simulated datasets CC-F11-AA (left panels) and CC-F11-XX (right panels). The top, middle, and bottom panels denote the results obtained from RABBIT (jointModel), GAIN, and HAPPY (diploid), respectively. The probabilities are represented by gray levels, with white =0 and black =1. The red lines denote the true ancestral origin states. The green vertical bars in the bottom panels denote the marker locations.
