# Supplementary material
Source: PubMed Central journal article supplement (PMC4574238)
Supplement: supp_115.177873_FigureS3.pdf [file supp_115.177873_FigureS3.pdf]

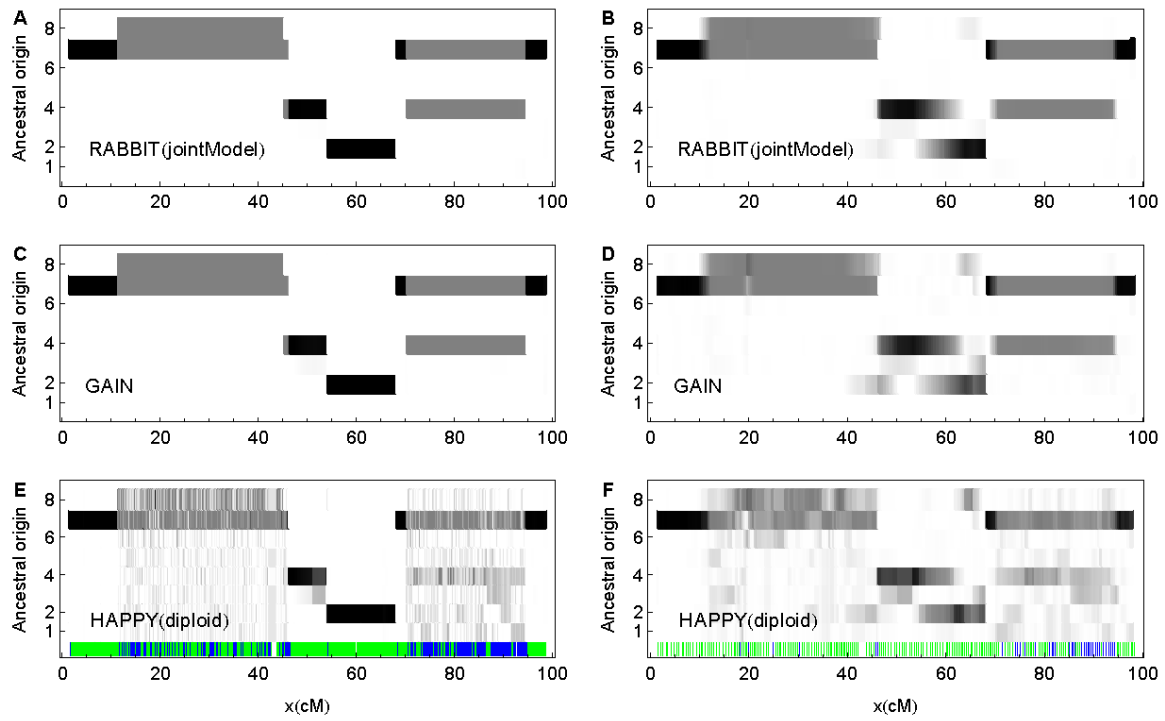

**Figure S3** Similar to Figure 7 but for the posterior probabilities of the eight ancestral origins along the first pair of autosomes of the example pre-CC line (IL-18).
