# Supplementary material
Source: PubMed Central journal article supplement (PMC4574238)
Supplement: supp_115.177873_TableS1.pdf [file supp_115.177873_TableS1.pdf]

**Table S1** Probability  $P(Y|Z, \epsilon)$  of the observed genotype  $Y$  given the true phased genotype  $Z$ , and the allelic typing error probability  $\epsilon$ . Dashes denote missing alleles in a sampled individual. In practice, genotypes  $1/-$  and  $2/-$  are rarely called from probe intensity data.

| Observed genotype $Y$ | True phased genotype $Z$  |                                 |                                 |                           |
|-----------------------|---------------------------|---------------------------------|---------------------------------|---------------------------|
|                       | (1, 1)                    | (1, 2)                          | (2, 1)                          | (2, 2)                    |
| $-/-$                 | 1                         | 1                               | 1                               | 1                         |
| $1/-$                 | $1 - \epsilon$            | $1/2$                           | $1/2$                           | $\epsilon$                |
| $2/-$                 | $\epsilon$                | $1/2$                           | $1/2$                           | $1 - \epsilon$            |
| $1/1$                 | $(1 - \epsilon)^2$        | $\epsilon(1 - \epsilon)$        | $\epsilon(1 - \epsilon)$        | $\epsilon^2$              |
| $1/2$                 | $2\epsilon(1 - \epsilon)$ | $\epsilon^2 + (1 - \epsilon)^2$ | $\epsilon^2 + (1 - \epsilon)^2$ | $2\epsilon(1 - \epsilon)$ |
| $2/2$                 | $\epsilon^2$              | $\epsilon(1 - \epsilon)$        | $\epsilon(1 - \epsilon)$        | $(1 - \epsilon)^2$        |
