# Supplementary material
Source: PubMed Central journal article supplement (PMC4574238)
Supplement: supp_115.177873_TableS2.pdf [file supp_115.177873_TableS2.pdf]

**Table S2** Probability  $P(\mathbf{D}|\mathbf{Z}, \mathbf{O}, \epsilon_F)$  of the derived genotype  $\mathbf{D}$  given the true phased genotype  $\mathbf{Z}$ , the latent ancestral origin state  $\mathbf{O}$ , and the allelic typing error probability  $\epsilon_F$ . The  $\delta$  is an indicator of the latent IBD, and the question marks denote missing alleles derived from founders.

| Derived genotype $\mathbf{D}$ | True phased genotype $\mathbf{Z}$                         |                                          |                                          |                                                           |
|-------------------------------|-----------------------------------------------------------|------------------------------------------|------------------------------------------|-----------------------------------------------------------|
|                               | (1, 1)                                                    | (1, 2)                                   | (2, 1)                                   | (2, 2)                                                    |
| (?, ?)                        | 1                                                         | $1 - \delta$                             | $1 - \delta$                             | 1                                                         |
| (?, 1)                        | $(1 - \delta)(1 - \epsilon_F)$                            | $(1 - \delta)\epsilon_F$                 | $(1 - \delta)(1 - \epsilon_F)$           | $(1 - \delta)\epsilon_F$                                  |
| (1, ?)                        | $(1 - \delta)(1 - \epsilon_F)$                            | $(1 - \delta)(1 - \epsilon_F)$           | $(1 - \delta)\epsilon_F$                 | $(1 - \delta)\epsilon_F$                                  |
| (2, ?)                        | $(1 - \delta)\epsilon_F$                                  | $(1 - \delta)(1 - \epsilon_F)$           | $(1 - \delta)\epsilon_F$                 | $(1 - \delta)(1 - \epsilon_F)$                            |
| (?, 2)                        | $(1 - \delta)\epsilon_F$                                  | $(1 - \delta)\epsilon_F$                 | $(1 - \delta)(1 - \epsilon_F)$           | $(1 - \delta)(1 - \epsilon_F)$                            |
| (1, 1)                        | $\delta(1 - \epsilon_F) + (1 - \delta)(1 - \epsilon_F)^2$ | $(1 - \delta)\epsilon_F(1 - \epsilon_F)$ | $(1 - \delta)\epsilon_F(1 - \epsilon_F)$ | $\delta\epsilon_F + (1 - \delta)\epsilon_F^2$             |
| (1, 2)                        | $(1 - \delta)\epsilon_F(1 - \epsilon_F)$                  | $(1 - \delta)(1 - \epsilon_F)^2$         | $(1 - \delta)\epsilon_F^2$               | $(1 - \delta)\epsilon_F(1 - \epsilon_F)$                  |
| (2, 1)                        | $(1 - \delta)\epsilon_F(1 - \epsilon_F)$                  | $(1 - \delta)\epsilon_F^2$               | $(1 - \delta)(1 - \epsilon_F)^2$         | $(1 - \delta)\epsilon_F(1 - \epsilon_F)$                  |
| (1, 2)                        | $\delta\epsilon_F + (1 - \delta)\epsilon_F^2$             | $(1 - \delta)\epsilon_F(1 - \epsilon_F)$ | $(1 - \delta)\epsilon_F(1 - \epsilon_F)$ | $\delta(1 - \epsilon_F) + (1 - \delta)(1 - \epsilon_F)^2$ |
