# Supplementary material
Source: PubMed Central journal article supplement (PMC4574238)
Supplement: supp_115.177873_TableS3.pdf [file supp_115.177873_TableS3.pdf]

**Table S3** Probability  $P(Y|Z, \epsilon)$  of the observed allele  $Y$  given the true allele  $Z$ , and the allelic typing error probability  $\epsilon$ . Dashes denote missing alleles in a sampled individual.

| Observed allele $Y$ | True allele $Z$ |                |
|---------------------|-----------------|----------------|
|                     | 1               | 2              |
| –                   | 1               | 1              |
| 1                   | $1 - \epsilon$  | $\epsilon$     |
| 2                   | $\epsilon$      | $1 - \epsilon$ |
