# Supplementary material
Source: PubMed Central journal article supplement (PMC4574238)
Supplement: supp_115.177873_TableS4.pdf [file supp_115.177873_TableS4.pdf]

**Table S4** Probability  $P(D|Z, O, \epsilon_F)$  of the derived allele  $D$  given the true allele  $Z$ , the latent ancestral origin  $O$ , and the allelic typing error probability  $\epsilon_F$ . The question marks denote missing alleles derived from founders.

| Derived allele $D$ | True allele $Z$  |                  |
|--------------------|------------------|------------------|
|                    | 1                | 2                |
| ?                  | 1                | 1                |
| 1                  | $1 - \epsilon_F$ | $\epsilon_F$     |
| 2                  | $\epsilon_F$     | $1 - \epsilon_F$ |
